# Supplementary material for: Redox-Active Gel Electrolyte Combined with Branched Polyaniline Nanofibers Doped with Ferrous Ions for Ultra-High-Performance Flexible Supercapacitors
Source: MDPI journal article supplement (doi:10.3390/polym11081357), 2019-08-16
Supplement: s1 [file s1]

## Supporting information

Table S1. EDX of PANI and 0.4M Fe<sup>2+</sup>/PANI (atomic concentration)

| Sample                      | C     | N     | O    | Cl   | Fe   |
|-----------------------------|-------|-------|------|------|------|
| PANI                        | 71.48 | 20.53 | 3.07 | 4.92 | -    |
| 0.4M Fe <sup>2+</sup> /PANI | 63.12 | 18.91 | 5.25 | 9.69 | 3.03 |

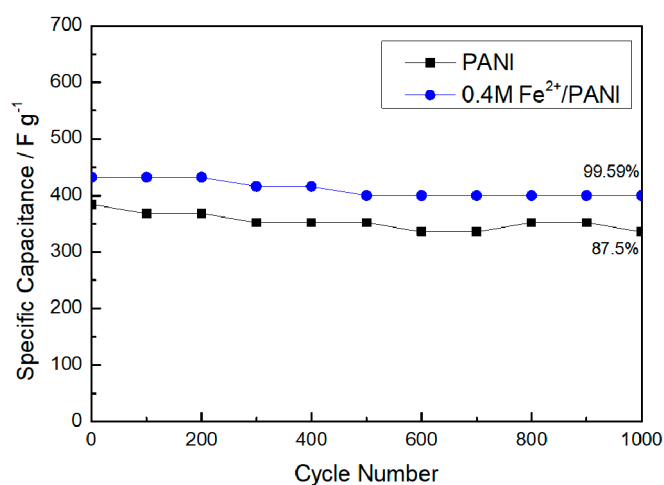

**Figure S1.** Cycling performance of symmetric PANI and 0.4M Fe<sup>2+</sup>/PANI SCs in 1M H<sub>2</sub>SO<sub>4</sub> electrolytes: capacitance retention at 20 A g<sup>-1</sup> for 1000 cycles.

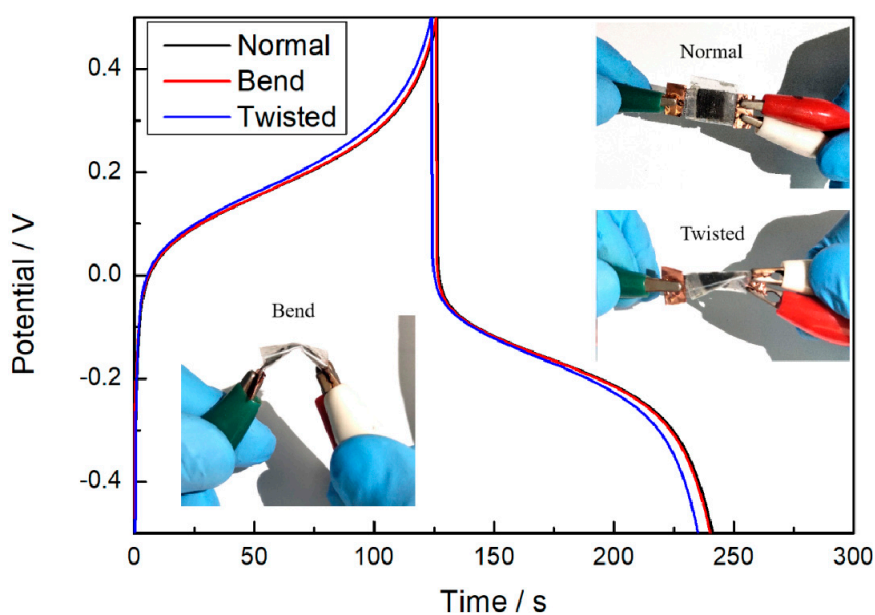

**Figure S2.** GCD curves of all-solid-state SC device under different deformation conditions.
